## CORRIGENDUM

# Corrigendum to: Microbial activity during a coastal phytoplankton bloom on the Western Antarctic Peninsula in late summer

\*Corresponding author: E-mail: [bdiez@bio.puc.cl](mailto:bdiez@bio.puc.cl)

In the originally published version of this manuscript, the Acknowledgements and Funding sections were incorrect and have now been updated as follows:

## ACKNOWLEDGEMENTS

The authors acknowledge Dr Beatriz Fernández-Gómez (BF-G) for their support with collecting samples and with the experimental work within Chile Bay, as well as the Armada de Chile staff at Arturo Prat Station and the staff from the Chilean Antarctic Institute (INACH) for their support with collecting samples within Chile Bay.

## FUNDING

This work was supported by The Chilean Antarctic Institute [grant number INACH T.15-10 and INACH FP.03.13 (latter to BF-G)], Programa de Cooperación Internacional (PCI)-Comisión Nacional de Investigación y Tecnología (CONICYT) [grant number DPI20140044], Fondo de Financiamiento de Centros de Investigación en Areas Prioritarias (FONDAP)-CONICYT [grant number FONDAP N°15110009], Fondo Nacional de Desarrollo Científico y Tecnológico (FONDECYT Postdoctoral) -CONICYT [grant numbers N°3170807 and N°3140422 (latter to BF-G)].
